# Supplementary material for: MaxSSmap: a GPU program for mapping divergent short reads to genomes with the maximum scoring subsequence
Source: PubMed Central journal article supplement (PMC4289234; doi:10.1186/1471-2164-15-969), 2014-11-15
Supplement: 12864_2014_6854_MOESM1_ESM.pdf [file 12864_2014_6854_MOESM1_ESM.pdf]

# Supplementary Material for "MaxSSmap: A GPU program for mapping divergent short reads to genomes with the maximum scoring subsequence"

Turki Turki\*

Usman Roshan<sup>†‡</sup>

## Program command lines for mapping reads

**MaxSSmap** ./MaxSSMap dnagenome -q <reads in FASTQ format> -f ecoli\_K12\_MG1665.fasta -cd 0 -nq 100000 -t 256 -fl 48. For human chromosome one genome mapping we set -fl to 480 instead of 48.

**SSW** ./ssw\_test -o 26 -e 1 -m 5 -x 4 -s -c -r ecoli\_K12\_MG1665.fasta <reads in FASTQ format>

**CUDA-SW++** ./cudasw -mat blosum45 -query <input reads in FASTA format and with reverse complement> -db ecoli\_K12\_MG1665.fasta.fixed\_512fragments -gapo 26 -gape 1 -topscore\_num 2 -min\_score 10 -use\_single 0

**BWA-MEM** bwa/bwa mem data/ecoli\_K12\_MG1665.fasta <reads in FASTQ format> -t 12

**NextGeneMap** ngm -q <reads in FASTQ format> -r ecoli\_K12\_MG1665.fasta -g 0

## High quality ancient horse DNA reads aligned by MaxSSmap

```
@SRR111892.21029.16>1.74744332.68.241013.80M0I * 0 0 NNNNGCTGAACCGCTCTTCCGATCTCGCCGACGATGTTCTTGCCGATGTCATGCACGTCGCCCTTCACCGTGGCGATGAG  
NNNN=>A??<@A@AAEA>AAAABAEEBEEEEEEHEEEFHBHEHFHFEHHHHHHHHHHHFGGGFGBGGGGEEE-GGGGG AS:128 MATCHES:48 MISMATCHES:27 GAPS:1
```

```
@SRR111892.70499.0>10.28374023.65.021797.80M0I * 0 0 TCGACGACCTGATCACCTGGGTACCCAGGAACCGTACCGGATGTTACGATCGGAAGAGCGGTTACGCAGGAATGNNN  
HHBGHHHHHHHDFFFGGGGGGGGHHHHBGGGGHHGHFHGH428 (224977HHDHEFHFEHFGDGEDGFEENNNN AS:141 MATCHES:50 MISMATCHES:26 GAPS:0
```

```
@SRR111892.79451.0>8.65158345.64.831848.53M1I7M1I18M0I * 0 0 CACGGCTGGTGGACGGCGCAGCAGCAGGAAATCTGGCGGTAAGCCAGATCGGAAGAGCGGTTACGCAGGAATGCNNN  
HHHHHGDGGG=AC>?EEEFEGGGGC8<CEGGEHGEHHHF>GFFAA<C>BBBBBECB8CDB><@>;>@>DBBB>NNNN AS:134 MATCHES:54 MISMATCHES:20 GAPS:2
```

\*Computer Science Department, King Abdulaziz University, P.O. Box 80221, Jeddah 21589, Saudi Arabia

<sup>†</sup>To whom correspondence should be addressed; usman@cs.njit.edu, Ph: 862-485-0590, Fax: 973-596-5777

<sup>‡</sup>Department of Computer Science, New Jersey Institute of Technology, Newark, NJ 07102
